# Supplementary material for: Electronic spectra of flavin in different redox and protonation states: a computational perspective on the effect of the electrostatic environment
Source: Royal Society of Chemistry journal article supplement (doi:10.1039/c9cp02230a), 2019-01-01
Supplement: c9cp02230a1.pdf [file c9cp02230a1.pdf]

**Supporting Information**

**for**

**Electronic Spectra of Flavin in Different Redox and Protonation States:  
A Computational Perspective on the Effect of the Electrostatic Environment**

Mohammad Pabel Kabir<sup>1</sup>, Yoelvis Orozco-Gonzalez<sup>1</sup>, Samer Gozem<sup>1\*</sup>

<sup>1</sup> Department of Chemistry, Georgia State University, Atlanta, GA 30302, United States

**Table of Contents:**

Calculation of Franck-Condon factors

Simulation of experimental spectra using broadening and normalization

Table of experimental  $\lambda_{\text{max}}$  values from literature for oxidized flavin

References

## Calculation of Franck-Condon factors

Franck-Condon (FC) factors are the overlap integrals between ground and excited state vibrational wave functions. In this work, FC factors were computed within the double-harmonic approximation and using Duschinsky rotations in ezSpectrum.<sup>1</sup> The software aligns the ground and excited state geometries to maximize overlap, performs Duschinsky rotations to maximize the overlap between normal modes, and then computes the overlap integral between the vibrational wave functions. This is most successful when there are limited changes in the geometry between the ground state and excited state, such as cases where the geometric changes are restricted to bond length changes. However, large differences in angles or torsions may result in reduced FC overlaps. Those were the issues we encountered when computing FC factors between ground and excited states of flavin in some states. Most often, such issues arose when there were methyl-group rotations, but in the case of the reduced flavin species bending or pyramidalization of the isoalloxazine backbone also complicated the calculation of FC factors. While such changes all occur along low-frequency modes, they still result in a significantly lower FC overlap. To remedy this, there were a number of approximations in the calculation of FC overlaps of some states:

- Excited state geometries were optimized keeping the same methyl group orientations as in the ground state. Sometimes, these methyl conformations were local minima and not global minima on the excited state potential energy surface resulting in small imaginary frequencies associated with methyl group rotations. Those methyl group rotations were then assigned small positive frequencies (10-30  $\text{cm}^{-1}$ ) in the calculation of FC factors such that they had little to no contribution to vibronic broadening of the electronic transitions<sup>2</sup> (an alternate approach used by Thiel and co-workers is to exclude such modes<sup>3,4</sup>).

- In the **Fl**, **FlH<sup>•</sup>**, and **Fl<sup>-</sup>** states, flavin remains planar in both the ground and  $\pi \rightarrow \pi^*$  excited states, but this is not the case for **FlH<sub>2</sub>** and **FlH<sup>-</sup>**. The hydroquinone ground state is bent at the central ring along a low-frequency (approximately 30-50 cm<sup>-1</sup>) “butterfly bending” mode.<sup>5-7</sup> However, the relevant  $\pi \rightarrow \pi^*$  excited states in **FlH<sub>2</sub>** and **FlH<sup>-</sup>** are planar. This again resulted in low FC overlaps due to the difference in this bending motion. Therefore, to compute FC factors, the ground state hydroquinone was reoptimized in a planar conformation and any imaginary frequencies resulting from this constraint were assigned small positive frequencies (10-30 cm<sup>-1</sup>) instead.
- In the case of **FlH<sub>2</sub>**, even the planar constraint did not yield substantially improved FC overlaps due to methyl rotations. Therefore, only for **FlH<sub>2</sub>**, FC factors were computed in a reduced model with no methyl group substituents.

Note that the approximations above were only use for computing the FC factors, while all adiabatic and zero-point vibrational energies were computed using full flavin models that were properly optimized. The FC factors are used in this work to determine the vibronic structure of each electronic transition and may not be quantitative due to the reasons discussed above.

## Simulation of experimental spectra using broadening and normalization

The simulation of experimental UV/vis spectra requires us to consider broadening of the computed vibronic excitation energies. In case of **FI**, **FIH<sup>•</sup>**, and **FI<sup>-</sup>** a full width at half maximum (FWHM) of 0.25 eV is used for all excited states. Relative peak intensities were computed from the relative oscillator strengths and FC overlaps of the corresponding excited states. Peak intensities for these three states were all normalized to the highest peak but were kept at the same relative intensities. In the case of **FIH<sub>2</sub>** and **FIH<sup>-</sup>**, it was necessary to use different FWHM and renormalize each peak independently to get spectra that agree with experiment. Specifically, a FWHM of 0.80 eV is used for both peaks in the **FIH<sub>2</sub>** spectrum while for **FIH<sup>-</sup>** FWHM of 0.35 eV and 0.90 eV were used for the second and third excited states, respectively. In both **FIH<sub>2</sub>** and **FIH<sup>-</sup>**, the first excited state is assumed to be dark. Therefore, the first, second, and third excited state intensities were scaled by factors of 0.00, 0.38, 1.00 and 0.00, 1.00, 0.50, respectively, for **FIH<sub>2</sub>** and **FIH<sup>-</sup>**, respectively. This tuning of the FWHM and renormalizing that is needed to match experimental data in hydroquinones is likely due to the approximations made in the calculation of the FC factors. However, we note that broadening is expected to be larger in hydroquinones systems than in the quinone and semiquinones because of the low-frequency bending/pyramidalization mode differences in the ground and excited state.

**Table of experimental  $\lambda_{\max}$  values from literature for oxidized flavin**

| PDB ID | Organism                         | Name              | 1 <sup>st</sup> peak<br>$\lambda_{\max}$ (nm) | 2 <sup>nd</sup> peak<br>$\lambda_{\max}$ (nm) | Ref.           |
|--------|----------------------------------|-------------------|-----------------------------------------------|-----------------------------------------------|----------------|
|        | N/A                              | Aqueous FMN       | 445                                           | 373                                           | 8              |
|        | N/A                              | Aqueous FAD       | 450                                           | 375                                           | 8              |
| 4HIA   | <i>Rhodobacter sphaeroides</i>   | RsLOV             | 447                                           | 380                                           | 9              |
| 4EES   | <i>Arabidopsis thaliana</i>      | iLOV              | 447                                           |                                               | 10             |
|        | <i>Arabidopsis thaliana</i>      | iLOV-Q489K        | 440                                           |                                               | 11             |
| 6GPU   | <i>Arabidopsis thaliana</i>      | miniSOG           | 448                                           |                                               | 12             |
| 4EEU   | <i>Arabidopsis thaliana</i>      | phiLOV2.1         | 450                                           |                                               | 13-15          |
| 2PR5   | <i>Bacillus subtilis</i>         | EcFbFP            | 448                                           |                                               | 14-19          |
| 4KUK   | <i>Dinoroseobacter shibae</i>    | DsLOV             | 449                                           |                                               | 20             |
|        | <i>Chlamydomonas reinhardtii</i> | CreiLOV           | 450                                           |                                               | 21             |
| 1N9L   | <i>Chlamydomonas reinhardtii</i> | LOV1              | 447.0                                         |                                               | 22             |
|        | <i>Chlamydomonas reinhardtii</i> | LOV1<br>F41Y      | 445.0                                         | 352.0                                         | 23             |
|        | <i>Chlamydomonas reinhardtii</i> | LOV2              | 445.5                                         |                                               | 22             |
| 3UE6   | <i>Vaucheria frigida</i>         | VafLOV            | 450                                           |                                               | 21, 24         |
| 5J3W   | <i>Pseudomonas putida</i>        | Pp1FbFP           | 450                                           | 376                                           | 14, 15, 25     |
|        | <i>Pseudomonas putida</i>        | Pp2FbFP           | 449                                           |                                               | 14, 15, 19, 25 |
|        | <i>Pseudomonas putida</i>        | Pp2FbFP<br>Y112L  | 449                                           |                                               | 14, 15, 19, 25 |
|        | <i>Pseudomonas putida</i>        | Pp2FbFP<br>Q116V  | 439                                           |                                               | 14, 15, 19, 25 |
|        | <i>Pseudomonas putida</i>        | Pp2FbFP<br>F37T/S | 450                                           |                                               | 15, 26         |
| 2Z6C   | <i>Arabidopsis thaliana</i>      | LOV1              | 448.5                                         |                                               | 22             |
| 4HHD   | <i>Arabidopsis thaliana</i>      | LOV2              | 446.5                                         |                                               | 22             |
| 2Z6D   | <i>Arabidopsis thaliana</i>      | LOV1              | 447.5                                         |                                               | 22             |
| 4EEP   | <i>Arabidopsis thaliana</i>      | LOV2              | 445.5                                         |                                               | 22             |
|        | <i>Rice</i>                      | LOV1              | 449.5                                         |                                               | 22             |
|        | <i>Rice</i>                      | LOV2              | 446.5                                         |                                               | 22             |
|        | <i>Rice</i>                      | LOV1              | 448.0                                         |                                               | 22             |
|        | <i>Rice</i>                      | LOV2              | 446.5                                         |                                               | 22             |
| 6CNY   | <i>Neurospora crassa</i>         | VVD               | 450                                           |                                               | 27             |
|        | <i>Oat</i>                       | LOV1              | 449                                           |                                               | 28             |
|        | <i>Oat</i>                       | LOV2              | 447                                           | 378                                           | 28             |

## References:

1. V. A. Mozhayskiy and A. I. Krylov, *Journal*, 2014.
2. F. J. Avila Ferrer and F. Santoro, *Phys Chem Chem Phys*, 2012, **14**, 13549-13563.
3. J. P. Götze, B. Karasulu and W. Thiel, *The Journal of chemical physics*, 2013, **139**, 234108.
4. B. Karasulu, J. P. Gotze and W. Thiel, *J Chem Theory Comput*, 2014, **10**, 5549-5566.
5. S. Nakai, F. Yoneda and T. Yamabe, *Theoretical Chemistry Accounts*, 1999, **103**, 109-116.
6. Y.-J. Zheng and R. L. Ornstein, *Journal of the American Chemical Society*, 1996, **118**, 9402-9408.
7. J. D. Walsh and A.-F. Miller, *Journal of Molecular Structure: THEOCHEM*, 2003, **623**, 185-195.
8. L. Whitby, *Biochemical Journal*, 1953, **54**, 437.
9. K. S. Conrad, A. M. Bilwes and B. R. Crane, *Biochemistry*, 2013, **52**, 378-391.
10. S. Chapman, C. Faulkner, E. Kaiserli, C. Garcia-Mata, E. I. Savenkov, A. G. Roberts, K. J. Oparka and J. M. Christie, *Proceedings of the National Academy of Sciences*, 2008, **105**, 20038-20043.
11. M. D. Davari, B. Kopka, M. Wingen, M. Bocola, T. Drepper, K.-E. Jaeger, U. Schwaneberg and U. Krauss, *The Journal of Physical Chemistry B*, 2016, **120**, 3344-3352.
12. X. Shu, V. Lev-Ram, T. J. Deerinck, Y. Qi, E. B. Ramko, M. W. Davidson, Y. Jin, M. H. Ellisman and R. Y. Tsien, *PLoS biology*, 2011, **9**, e1001041.
13. J. M. Christie, K. Hitomi, A. S. Arvai, K. A. Hartfield, M. Mettlen, A. J. Pratt, J. A. Tainer and E. D. Getzoff, *Journal of Biological Chemistry*, 2012, **287**, 22295-22304.
14. M. Wingen, J. Potzkei, S. Endres, G. Casini, C. Rupprecht, C. Fahlke, U. Krauss, K.-E. Jaeger, T. Drepper and T. Gensch, *Photochemical & photobiological sciences*, 2014, **13**, 875-883.
15. A. M. Buckley, J. Petersen, A. J. Roe, G. R. Douce and J. M. Christie, *Current opinion in chemical biology*, 2015, **27**, 39-45.
16. N. Suzuki, N. Takaya, T. Hoshino and A. Nakamura, *The Journal of general and applied microbiology*, 2007, **53**, 81-88.
17. A. Mukherjee, J. Walker, K. B. Weyant and C. M. Schroeder, *PLoS one*, 2013, **8**, e64753.
18. T. Drepper, T. Eggert, F. Circolone, A. Heck, U. Krauß, J.-K. Guterl, M. Wendorff, A. Losi, W. Gärtner and K.-E. Jaeger, *Nature biotechnology*, 2007, **25**, 443.
19. U. Krauss, A. Losi, W. Gärtner, K.-E. Jaeger and T. Eggert, *Physical Chemistry Chemical Physics*, 2005, **7**, 2804-2811.
20. S. Endres, J. Granzin, F. Circolone, A. Stadler, U. Krauss, T. Drepper, V. Svensson, E. Knieps-Grünhagen, A. Wirtz and A. Cousin, *BMC microbiology*, 2015, **15**, 30.
21. A. Mukherjee, K. B. Weyant, U. Agrawal, J. Walker, I. K. Cann and C. M. Schroeder, *ACS synthetic biology*, 2014, **4**, 371-377.
22. M. Kasahara, T. E. Swartz, M. A. Olney, A. Onodera, N. Mochizuki, H. Fukuzawa, E. Asamizu, S. Tabata, H. Kanegae and M. Takano, *Plant physiology*, 2002, **129**, 762-773.
23. K. Magerl, I. Stambolic and B. Dick, *Physical Chemistry Chemical Physics*, 2017, **19**, 10808-10819.
24. D. Mitra, X. Yang and K. Moffat, *Structure*, 2012, **20**, 698-706.
25. K. Jentzsch, A. Wirtz, F. Circolone, T. Drepper, A. Losi, W. Gärtner, K.-E. Jaeger and U. Krauss, *Biochemistry*, 2009, **48**, 10321-10333.
26. A. Mukherjee, K. B. Weyant, J. Walker and C. M. Schroeder, *Journal of biological engineering*, 2012, **6**, 20.
27. B. D. Zoltowski, C. Schwerdtfeger, J. Widom, J. J. Loros, A. M. Bilwes, J. C. Dunlap and B. R. Crane, *Science*, 2007, **316**, 1054-1057.
28. M. Salomon, J. M. Christie, E. Knieb, U. Lempert and W. R. Briggs, *Biochemistry*, 2000, **39**, 9401-9410.
